# Supplementary material for: Evaluation of the Essential Oil Composition of Five Thymus Species Native to Greece
Source: MDPI journal article supplement (doi:10.3390/chemosensors12010007), 2023-12-31
Supplement: s1 [file s1]

# Evaluation of the Essential Oil Composition of Five *Thymus* Species of Native to Greece

Eleni Kakouri <sup>1</sup>, Dimitra Daferera <sup>1</sup>, Anastasia Andriopoulou <sup>1</sup>, Panayiotis Trigas <sup>2</sup> and Petros A. Tarantilis <sup>1\*</sup>

<sup>1</sup> Laboratory of Chemistry, Department of Food Science and Human Nutrition, School of Food and Nutritional Sciences, Agricultural University of Athens, Iera Odos 75, 118 55 Athens, Greece

<sup>2</sup> Laboratory of Systematic Botany, Department of Crop Science, School of Plant Sciences, Agricultural University of Athens, Iera Odos 75, 118 55 Athens, Greece; Eleni Kakouri: elenikakouri@aua.gr; Dimitra Daferera: daferera@aua.gr; Anastasia Andriopoulou: natandriop@gmail.com; Panayiotis Trigas: trigas@aua.gr

\*Correspondence: Petros A. Tarantilis; e-mail address: ptara@aua.gr; Tel: +30-210-5294265, Iera Odos 75, 118 55 Athens, Greece

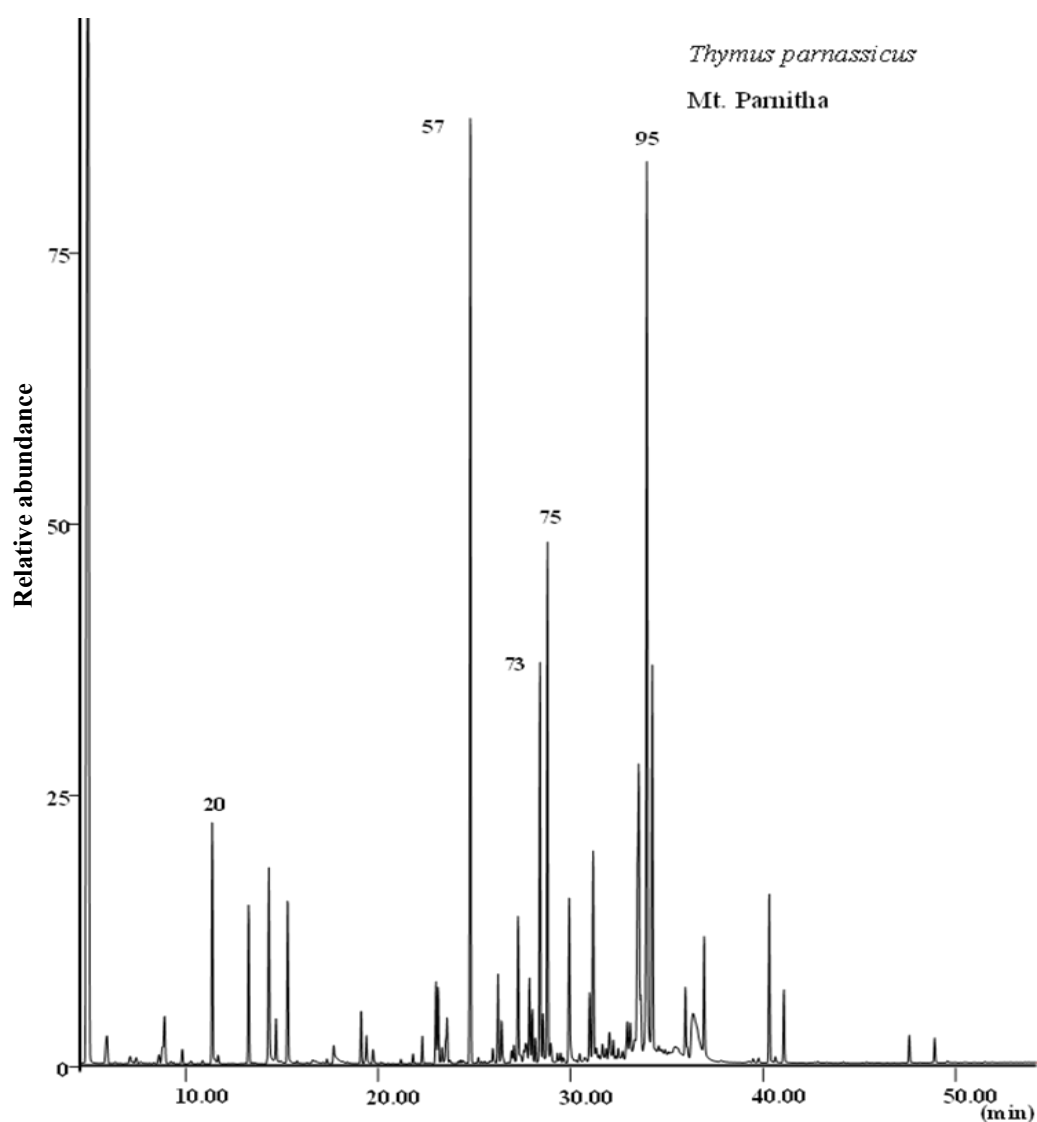

Figure S1: GC-MS chromatogram of *T. parnassicus* (Mt. Parnitha)

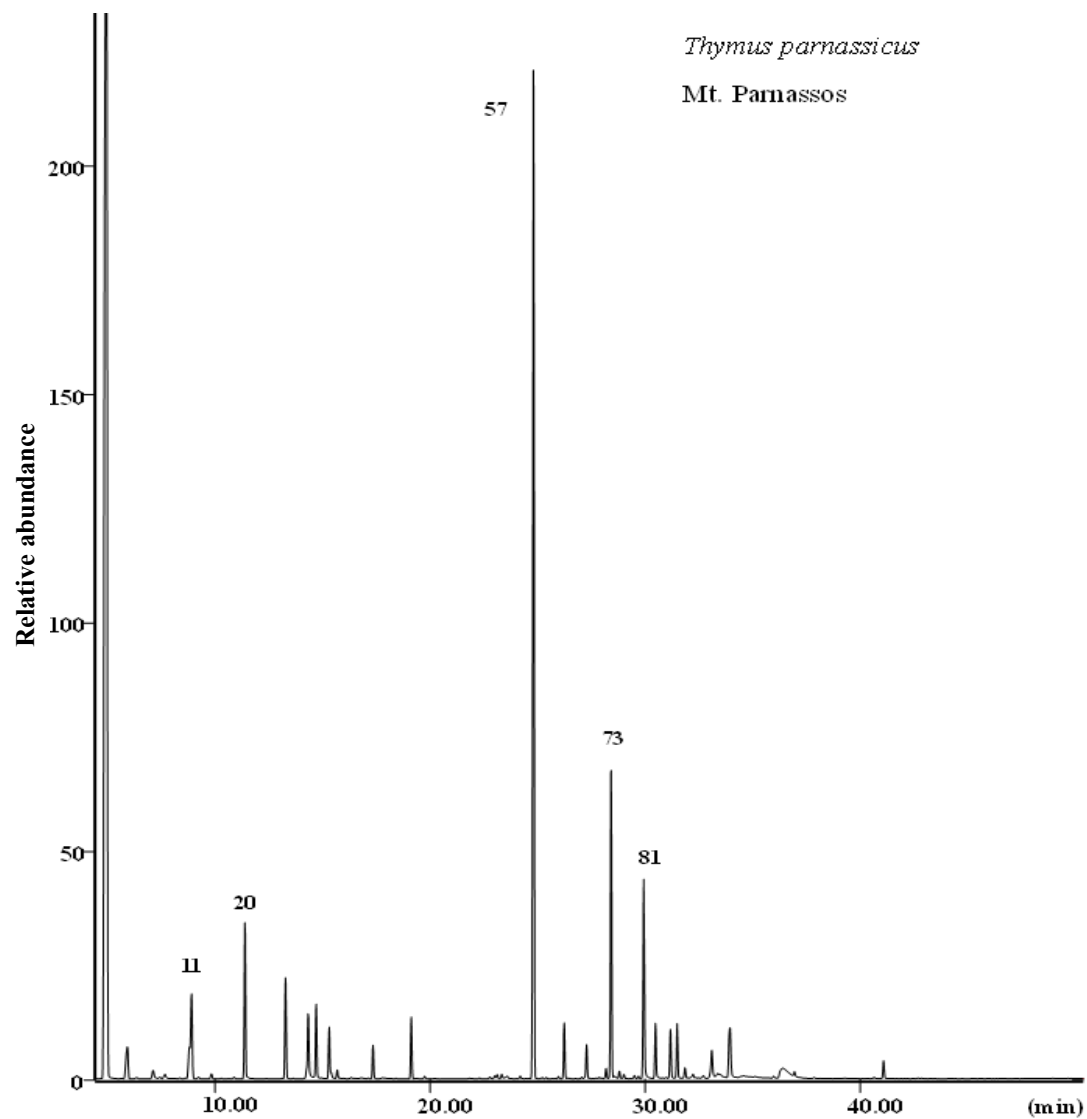

Figure S2: GC-MS chromatogram of *T. parnassicus* (Mt. Parnassos)

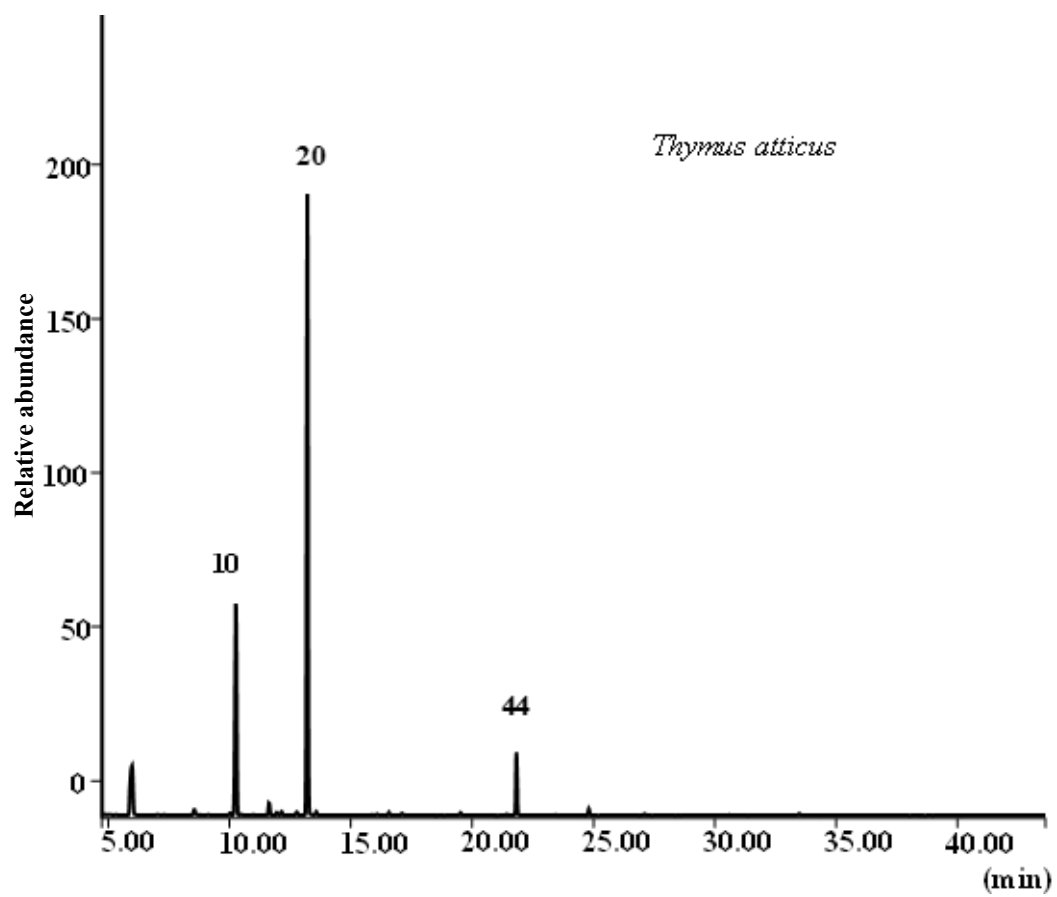

Figure S3: GC-MS chromatogram of *T. atticus* (Mt. Chelmos)

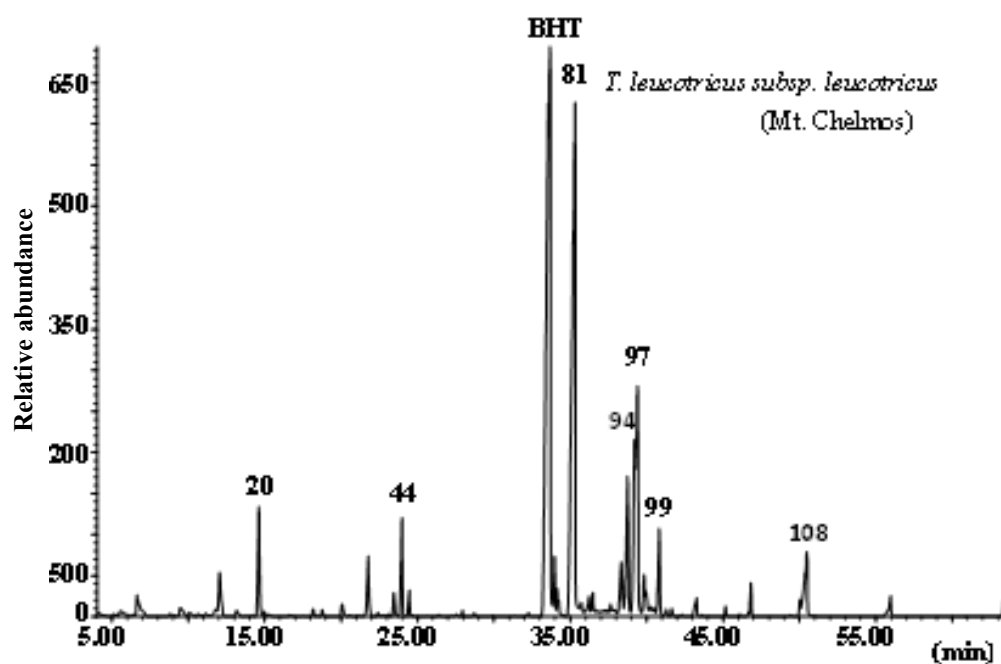

Figure S4: GC-MS chromatogram of *T. leucotricus subsp. leucotricus* (Mt. Chelmos)

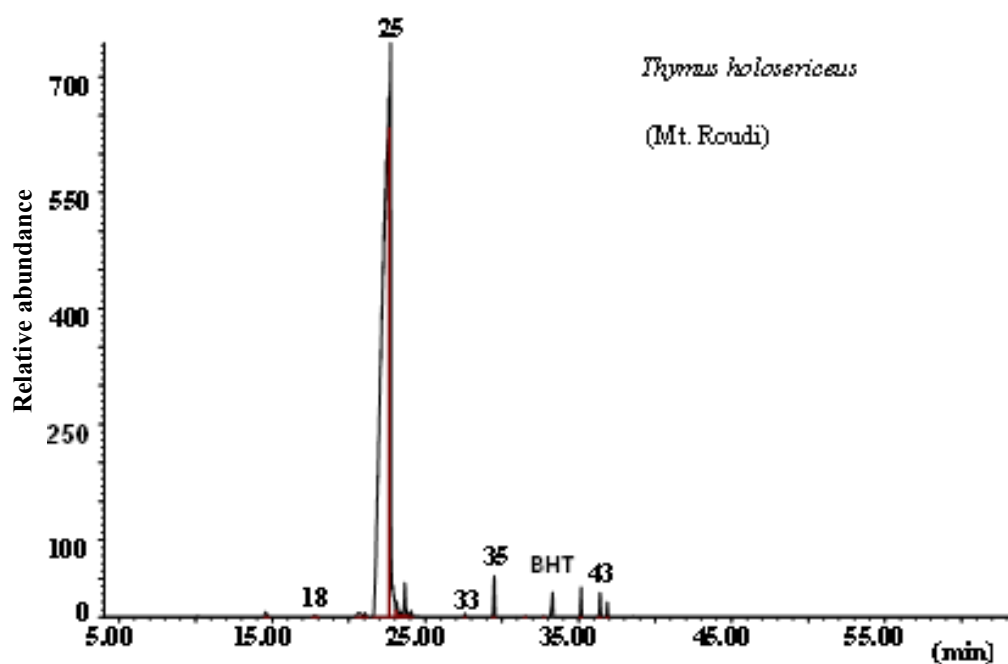

Figure S5: GC-MS chromatogram of *T. holosericeus* (Mt. Roudi)

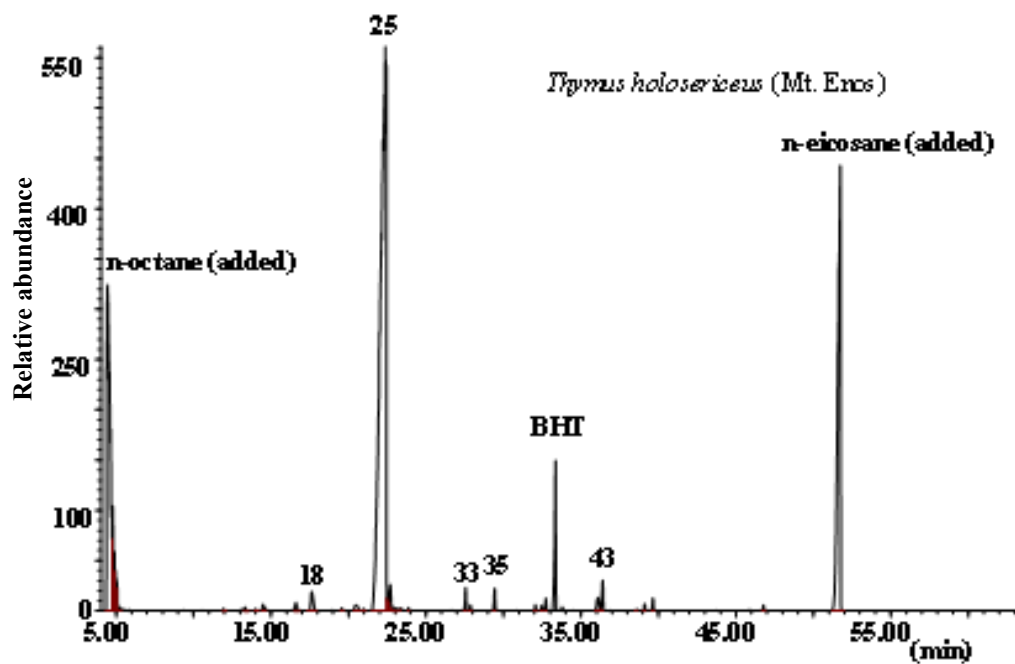

Figure S6: GC-MS chromatogram of *T. holosericeus* (Mt. Enos)

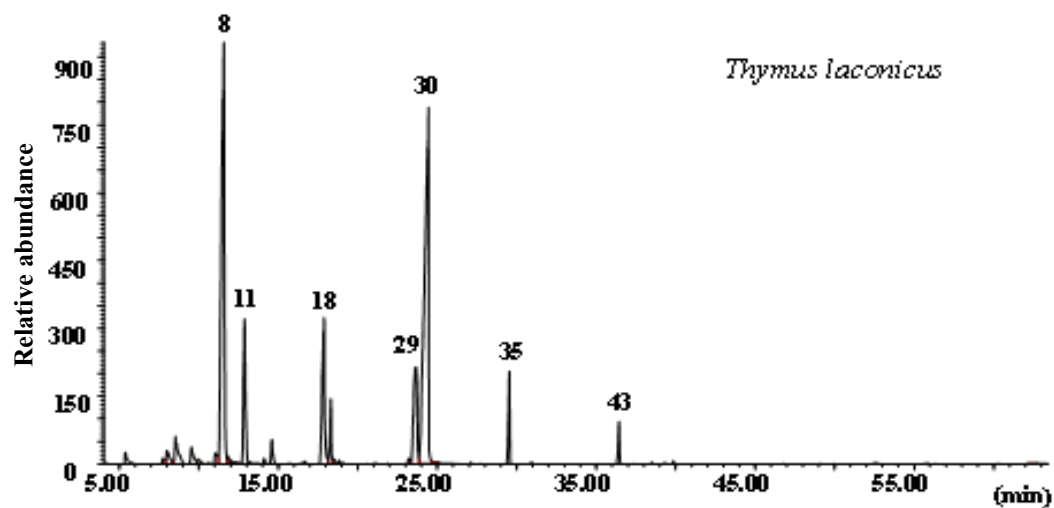

Figure S7: GC-MS chromatogram of *T. laconicus* (Geraki Lakonias)
